# Supplementary material for: Only the instantaneous global warming potential is consistent withhonest and responsible greenhouse gas accounting
Source: Copernicus journal article supplement (doi:10.5194/esd-2018-22), 2018-05-08
Supplement: Supplementary file [file esd-2018-22-AC6-supplement.pdf]

# ~~Only the instantaneous global warming potential is consistent with honest and responsible~~ Proposed policymaker-friendly metric of radiative effects of greenhouse gas accounting gases

Peter Nightingale

Department of Physics, University of Rhode Island, Kingston, Rhode Island 02881, U.S.A.

**Correspondence:** Peter Nightingale (nightingale@uri.edu)

## Abstract.

~~This paper presents a simple model to describe the~~ This paper proposes a simple metric for the dynamic evaluation of the cumulative, combined impact on global warming of greenhouse gasses. As an illustration, the metric is applied to methane (natural gas) when used for energy production. The model is used to estimate the near-term effect proposed metric accounts for the effect on a decadal timescale of energy policies based on natural gas as a purported bridge fuel. The results make it clear that the ~~Results of a thought experiment evaluated by the proposed metric explicitly show problematic policy aspects of the commonly employed global warming potential of methane with a 100-year time horizon~~ has the following problems which:

~~1: it produces misleading results; is inconsistent with meaningful~~ lacks a solid scientific basis and is incompatible with crucial timescales;

10 ~~2: does not allow for continuous-time dynamic~~ tracking of greenhouse gas emissions; and

~~3: is incompatible with the precautionary principle~~ Precautionary Principle.

## 1 Introduction

~~In 2008, Hansen et al. (2008) argued~~ Hansen et al. (2008) argue that atmospheric CO<sub>2</sub> concentration exceeding 350 ppm poses ~~an unacceptable danger a serious threat~~ and life on earth in general. As the authors put it in their abstract:

15 If humanity wishes to preserve a planet similar to that on which civilization developed and to which life on Earth is adapted, paleoclimate evidence and ongoing climate change suggest that CO<sub>2</sub> will need to be reduced from its current 385 ppm to at most 350 ppm, but likely less than that. The largest uncertainty in the target arises from possible changes of non-CO<sub>2</sub> climate forcings.

The paper warned that continued growth of greenhouse gas emissions for just another decade—after 2008—would make it 20 practically impossible to avoid catastrophic effects on the climate system. ~~Nonetheless, a~~ A decade later, atmospheric CO<sub>2</sub> is fluctuating around 410 ppm (Pro Oxygen, 2018) and it ~~is still~~ still appears to be increasing at a rate roughly in the range of 2–2.5 percent per year.

In the aforementioned quote, the authors qualify the critical number, 350 ppm, mentioning that it is likely too high, as it fails to account fully for the dangers of non-CO<sub>2</sub> forcings. Of these, atmospheric methane is ~~the dominantone~~dominant. What is more, methane forcing ~~is currently far more dangerous~~today is far more impactful than it was in 2008. For instance, Turner et al. (2016) concluded on the basis of satellite and surface data that there had been a large increase in the methane emissions  
5 of the United States over the decade prior to their ~~2016~~study. Worden et al. (2017) subsequently traced ~~these increases~~this increase back to fossil fuel sources.

At the same time, ~~it has become increasingly clear~~that as numerous publications over the last decade have made clear, the climate system is ~~deteriorating at the~~changing at a rate outpacing projections, those of the Intergovernmental Panel on Climate Change (IPCC) in particular. ~~Brysse et al. discuss numerous examples of scientists “erring on the side of least drama”~~  
10 ~~(Brysse et al., 2013)~~Among the most disconcerting such ~~For instance,~~Rahmstorf et al. (2007) mention that projections may have underestimated changes in sea level rise. Hansen et al. (2013) mention that end of summer Arctic sea ice has been declining a factor of four faster than in IPCC models. Also the *Third National Climate Assessment* (Melillo et al., 2014) states that the “only real surprises have been that some changes, such as sea level rise and Arctic sea ice decline, have outpaced earlier projections.” Brown and Caldeira (2017) discuss rapid nonlinear melting of the Greenland and Antarctic ice sheets not  
15 represented in IPCC model assessments.

There are numerous other such under-predicted developments ~~is such as, for example,~~ the Arctic amplification documented in recent ~~Arctic Report Cards~~Arctic Report Cards issued by the ~~United States National Oceanic Atmospheric Administration~~  
(National Oceanic Atmospheric Administration, a, b) ~~.~~National Oceanic Atmospheric Administration (a, b) . Underestimates should not come as a surprise. Indeed, Brysse et al. (2013) et al. discuss a series of examples of scientists “erring on the side  
20 of least drama.”

~~Because of the shift in the United States to natural gas,<sup>1</sup> which is used increasingly for the generation of electricity, it is imperative to reconsider the overemphasis in policy decisions on emissions.~~This overemphasis results from the common practice of using the 100-year horizon Developments of the cryosphere clearly have a large decadal component and indeed, as  
Steffen et al. (2018) and also Rintoul et al. (2018) have argued, decisions made during the next one or two decades may lead to  
25 irreversible changes of the climate system. Nonetheless, and in spite of critical observations of IPCC going back to its *Second Assessment Report* (Houghton et al., 1995) , the global warming potential ~~in the calculation of the (GWP) with a 100-year time horizon has become the metric employed— pursuant to the United Nations Framework Convention on Climate Change (UNFCCC) —~~  
to assess public policy with respect to multi-gas (usually called CO<sub>2</sub> equivalents upon which climate policies are based pursuant to the United Nations Framework Convention on Climate Change (United Nations Framework Convention on Climate Change (UNFCCC))  
30 emissions.

~~The~~With the considerations in mind it should be noted that IPCC’s *Fifth Assessment Report* of Intergovernmental Panel on Climate Change (IPCC (AR5)) explicitly states that there is no scientific argument for using the 100-year GWP horizon—see, e.g., page 711 of Myhre et al. (2013) .~~To the contrary, when the time scale of climate change is likely to be decadal, it is vital~~

---

<sup>1</sup>~~Exploration and production subsidies from the federal government have increased dramatically, during the Obama administration; see, e.g. Oilchange International . This trend is expected to continue or accelerate during the Trump administration.~~

~~not to use~~ Stocker et al. (2013).<sup>1</sup> In fact, as AR5 puts it: “All choices of metric contain implicit value-related judgements such as type of effect considered and weighting of effects over time.” Note against this background that Ocko et al. (2017) have pressed for more transparency in climate policy issues with respect to the often hidden implied temporal trade-offs.

5 The climate system of the earth is a complex system far from thermodynamic equilibrium with many inseparable time- and lengthscales. In such a system, uncontrolled, scientifically hard to justify approximations will always characterize any attempt to isolate simple metrics for use by policy makers to gauge—as was IPCC’s design purpose—the relative radiative effects of diverse greenhouse gasses.

10 More specifically, as argued above, the disruption of the climate system of the earth and the human role in it clearly have important decadal timescale features. Given this, use of the 100-year horizon as the basis of major energy policy decisions ~~stated more bluntly, given the danger to which it subjects life on Earth, this choice is irresponsible and constitutes a patent violation of the precautionary principle~~ has no basis in science. Whatever value judgments may have led to general acceptance of this 100-year metric, it appears to be irreconcilable with the Precautionary Principle, number 15 of the Rio Declaration United Nations General Assembly; United Nations Change Change ~~of the United Nations General Assembly; United Nations Change Ch~~ For further discussion of this see Section 2.

15 ~~This paper presents a simple dynamical model that~~ In addition to these general considerations and because of the shift in the United States over the last decade to natural gas,<sup>2</sup> which is used increasingly for the generation of electricity, it is imperative to provide policymakers with tools that do not downplay the effects of non-CO<sub>2</sub> emissions with very strong near-term effects on the climate.

20 The simple dynamical metric proposed here produces order of magnitude estimates ~~using-based~~ the instantaneous global warming potential rather than the one based on the 100-year horizon. The results ~~form the basis of the statement made above global warming potentials based on~~ show that simple, user-friendly alternatives exist for the 100-year time horizon ~~must be abandoned once and for all for major policy development.~~ (Edwards and Trancik, 2014) ~~global warming potential.~~ Edwards and Trancik (2014) presented a similar ~~line of reasoning~~ approach, one that ~~focusses also focuses~~ on a dynamical approach rather than the static one ~~that is~~ implicit in the use of any non-instantaneous global warming potential.

25 The layout of the paper is as follows: ~~in~~ Section 2 reviews some of the well-known basic properties of methane and introduces the ~~simple dynamical model mentioned before~~ proposed simple dynamical metric. Section 3 presents results of some simple energy policy thought experiments. Finally, Section 4 summarizes the conclusions.

## 2 Methane basics

30 ~~To estimate the effect of a given greenhouse gas~~ The global warming potential, as mentioned in Section 1, is a simple tool designed to estimate the relative effect of greenhouse gasses on global warming ~~one uses the global warming potential~~

<sup>1</sup>The following is a representative list of comments about the global warming potential to be found in various IPCC assessments: Houghton et al. (1995) pages 21 and 73; and Stocker et al. (2013) pages 58, 663, 710, and 711.

<sup>2</sup>Exploration and production subsidies from the federal government have increased dramatically, during the Obama administration; see, e.g., Oilchange International. This trend is expected to accelerate during the Trump administration.

mentioned in Section 1. It was designed and accepted to assist in policy making. This quantity is a dimensionless multiplier that converts the effect of the emission of a unit mass pulse of a greenhouse gas under consideration to a mass of CO<sub>2</sub> that would have the same global warming effect, the CO<sub>2</sub> equivalent (CO<sub>2</sub>e) mass. A pulse of CO<sub>2</sub> injected into the atmosphere is taken up by the ocean, biosphere and soil and decays by half in about 25 years but 20% is still in the atmosphere after 50 years; see Fig. 4A in Hansen et al. (2013).

Atmospheric CH<sub>4</sub>, on the other hand, has a half-life of less than a decade. ~~The~~ More explicitly, the global warming potential, as defined in Section 8.7.1.2 of Myhre et al. (2013) Stocker et al. (2013), is a fraction: the time-integral of the radiative forcing due to a pulse emission of a given greenhouse gas divided by same quantity for a pulse of an equal mass of CO<sub>2</sub>. Due to the atmospheric dynamics of both CO<sub>2</sub> and CH<sub>4</sub> the resulting global warming potential depends on the time interval used in the integrals, aka the time horizon. The global warming potential is denoted by  $G_t$  with  $t$  the time horizon ~~measured in years. Use of this quantity to make predictions about the climate system amounts to an uncontrolled approximation, but one would expect it to yield reasonable order of magnitude estimates if used with care.~~ in units of years.

~~Unfortunately, however, the~~ The choice of the ~~time-time~~ horizon  $t$  is a major source of ~~confusion~~ arbitrariness. In addition to the value judgment mentioned in Section 1 and acknowledged by the Intergovernmental Panel on Climate Change (IPCC), there is ~~an~~ the issue of the ~~time-scale~~ timescales relevant to the ~~process or policy decision~~ physical process and policy decisions under consideration.

For a project small on a global scale, averaging emissions over the expected life time of that project ~~makes~~ might make physical sense, but for matters of global scale, such as the energy policy ~~of the United States~~ major global greenhouse gas emitting nations, the horizon should be set by the ~~time-scale of the~~ timescale of the global climate change phenomena and the danger they pose to life on Earth. Therefore, ~~one has to consider the following as mentioned in Section 1, there notably are the following considerations, among others:~~

1. The arguments made by ~~Hansen in~~ Hansen (2005) and the well-known difficulty of predicting instabilities (aka state shifts or tipping points) such as the sudden and, on a human multi-generational ~~time-scale~~ timescale irreversible, disintegration of ice sheets ~~; i.e., as Drijfhout et al. (2015) put it, the fact that tipping points “notoriously difficult to foresee.”~~
2. Recent developments on a decadal ~~time-scale~~ timescale in the Arctic (~~National Oceanic Atmospheric Administration, a; ?~~ (National Oceanic Atmospheric Administration, a, b));
3. The ~~obligation to heed the precautionary principle~~ fact that decisions made in the next one or two decades may determine the fate of the future of Antarctica and the Southern Ocean, as argued by Rintoul et al. (2018) argue, or set the climate system on a for all practical purposes irreversible trajectory to what Steffen et al. (2018) refer to as “Hothouse Earth;”
4. The international treaty obligation of the Precautionary Principle 15 of Rio Declaration mentioned in the Section 1 (United Nations General Assembly; United Nations Change Change).

Based on these [physical considerations matters](#), and the simple, mathematical fact that non-instantaneous global warming potentials [are incompatible with cannot be used straightforwardly in](#) a dynamical approach, [the metric proposed in](#) this paper uses the instantaneous global warming potential  $G_0$ , [the instantaneous radiative forcing relative to that of CO<sub>2</sub>](#).

The effect of the choice of the [time](#) horizon manifests itself [explicitly](#) in the critical fraction  $f_c$  of fugitive CH<sub>4</sub> above which the global warming impact of the unburned, fugitive methane cancels out its higher energy density per unit emitted CO<sub>2</sub>. To find  $f_c$ , suppose one generates energy from one mole of CH<sub>4</sub> a fraction  $f$  of which escapes unburned. The part that is burned adds  $(1 - f)$  moles of CO<sub>2</sub> to the atmosphere. Given  $G_t$ , the global warming potential of CH<sub>4</sub>, the fraction  $f$  of fugitive CH<sub>4</sub> adds  $(4/11)fG_t \equiv G'_t$  to the atmospheric CO<sub>2</sub> equivalent. The total increase is  $1 - f + fG'_t$ . Note that the molecular mass ratio 4/11 of CH<sub>4</sub> and CO<sub>2</sub> appears because of the conventional definition of the global warming potential  $G_t$ , which compares the effects of a [unit mass](#) of CH<sub>4</sub> of to the effect of the same [mass mass](#) of CO<sub>2</sub>, rather than the same number of [moles; see](#) (Myhre et al., 2013, p. 710) [moles; see](#) (Stocker et al., 2013, p. 710).

Different fuels emit different amounts of CO<sub>2</sub> per unit energy produced upon combustion. Suppose that per unit CO<sub>2</sub> produced, CH<sub>4</sub> generates a factor  $\varepsilon$  more energy than some other fuel, say coal or oil. For coal the calculations in this paper use [typical values](#):  $\varepsilon = 2$  and for oil  $\varepsilon = 4/3$  (U.S. Energy Information Administration (EIA), 2018). Taking into account the fugitive gas loss of CH<sub>4</sub>, to produce the same amount of electric energy as from CH<sub>4</sub>, one has to burn a relative amount of  $(1 - f)\varepsilon$  coal or oil.

The critical fraction  $f_c$  for which both processes have the same impact on the climate follows from the equation

$$1 - f_c + f_c G'_t = (1 - f_c)\varepsilon, \quad (1)$$

so that

$$f_c = \frac{\varepsilon - 1}{\varepsilon - 1 + G'_t}. \quad (2)$$

Tab. 1 shows the critical fractions for fugitive [for various time horizons and fuels](#).<sup>3</sup> CH<sub>4</sub> [for various time horizons and fuels](#).<sup>3</sup>

**Table 1.** Critical fractions  $f_c$  for coal and oil for global warming potentials  $G_t$  with various time horizons  $t$  in units of years.

|                                   | $G_0 = 120$ | $G_{20} = 34$ | $G_{100} = 86$ |
|-----------------------------------|-------------|---------------|----------------|
| $\varepsilon = 2$ (coal)          | 2.2%        | 3.1%          | 7.5%           |
| $\varepsilon = \frac{4}{3}$ (oil) | 0.76%       | 1.1%          | 2.6%           |

Before discussing the relevant kinetic equations, we recall that the solution of the decay equation with decay time  $\tau$  for any  $g(t)$  with source  $s(t)$  subject to initial condition  $g(0) = 0$ ,

$$\dot{g}(t) = -g(t)/\tau + s(t), \quad (3)$$

<sup>3</sup>For the global warming potential  $G_t$  see (Myhre et al., 2013, Table 8.7), which contains the numbers for the 20- and 100-year horizons, viz. 86 and 34. For further details and the instantaneous global warming potential see Fig. 8.29, Tables 8.7 and 8.A.1 on pages 712, 714, and 731, *ibid*.

<sup>3</sup>For the global warming potential  $G_t$  see (Stocker et al., 2013, Table 8.7), which contains the numbers for the 20- and 100-year horizons, viz. 86 and 34. For further details and the instantaneous global warming potential see Fig. 8.29, Tables 8.7 and 8.A.1 on pages 712, 714, and 731, *ibid*.

where  $\dot{g} = dg/dt$ , is given by

$$g(t) = \int_0^t e^{-(t-t')/\tau} s(t') dt', \quad (4)$$

for  $t \geq 0$ .

For the kinetic equations it is convenient to use molar number densities:  $c(t)$  for CO<sub>2</sub>,  $m(t)$  for CH<sub>4</sub>, and  $c_e(t)$  for the CO<sub>2</sub> equivalent of the mix. Generalization is straightforward, but to simplify the thought experiment presented in this paper and obtain the order-of-magnitude estimates of interest—the results of which are in Section 3—it suffices to account only for the greenhouse gases CO<sub>2</sub> and CH<sub>4</sub>. The CO<sub>2</sub> equivalent is given by:

$$c_e(t) = c(t) + G'_0 m(t). \quad (5)$$

Because of the mass convention used in the definition of the global warming potential, this equation once again contains  $G'_0$  rather than  $G_0$ . A further assumption in this thought experiment is that all of the ~~increase~~ increase in atmospheric CO<sub>2</sub> comes from the hypothetical future use of methane only. ~~Then~~ As a consequence, there are the following sources for increased emissions: (i) the combustion of CH<sub>4</sub>; and (ii) the oxidation of fugitive ~~methane~~ CH<sub>4</sub> as it decays in the atmosphere. This will correspond to two source terms in the kinetic equations.

That is, if  $p(t)$  is the rate of increase in CO<sub>2</sub> produced by coal or oil, using methane to generate the same power, yields the following rate of increase of CO<sub>2</sub>:

$$\dot{c}(t) = p(t)/\varepsilon + m(t)/\tau, \quad (6)$$

where the last term arises from the CO<sub>2</sub> production rate due to the oxidation of atmospheric CH<sub>4</sub>; here  $\tau = 12.4$  year, the atmospheric decay time of CH<sub>4</sub> (~~Myhre et al., 2013, Table 8.7~~) (Stocker et al., 2013, Table 8.7). The rate of increase of CH<sub>4</sub> is:

$$\dot{m}(t) = -m(t)/\tau + \frac{f}{(1-f)\varepsilon} p(t), \quad (7)$$

the last term accounts for the emission of fugitive CH<sub>4</sub>. The desired solution of the differential equations corresponds to the hypothetical case in which for  $t < 0$  power generated by combustion of coal and oil only. At  $t = 0$  the a complete switch takes place to CH<sub>4</sub>. The corresponding solution, subject to initial condition  $m(0) = 0$ , ~~is~~ —a simplification made for the purpose of this thought experiment—is

$$m(t) = \int_0^t e^{-(t-t')/\tau} \frac{f}{(1-f)\varepsilon} p(t_1) dt_1. \quad (8)$$

Substitute Eq. (8) into Eq. (6) and integrate, assuming  $c(-\infty) = 0$

$$c(t) = \int_{-\infty}^0 p(t_1) dt_1 + \int_0^t [p(t_1)/\varepsilon + m(t_1)/\tau] dt_1. \quad (9)$$

An additional assumption made in the choice of this metric is that  $\text{CO}_2$  is treated as an atmospheric gas with an *infinite decay time*. In other words, for  $\text{CO}_2$  the first term on the right-hand side of Eq. (3) vanishes, so that  $\text{CO}_2$  evolves by simply adding up for ever. The justification for this approximation is that, as shown by Matthews et al. (2009), the total allowable emissions, *i.e.*, the budget for climate stabilization, is approximately independent of the time and place of those emissions. At the same time, the metric developed here is set up so that policy makers can track the expenditures to be charged to that budget as a result of their policies.

The final result for the atmospheric  $\text{CO}_2$  equivalent concentration at time  $t > 0$  is obtained by substituting Eqs. (8) and (9) into Eq. (5). ~~The result is:~~ Subject to the specified initial conditions, the solution of the differential equations is:

$$c_e(t) = \int_{-\infty}^0 p(t) dt + \frac{1}{\varepsilon} \int_0^t p(t_1) dt_1 + \frac{f}{(1-f)\varepsilon} \left[ G'_0 \int_0^t e^{\frac{t_1-t}{\tau}} p(t_1) dt_1 + \frac{1}{\tau} \int_0^t \int_0^{t_1} e^{\frac{t_2-t_1}{\tau}} p(t_2) dt_2 dt_1 \right]. \quad (10)$$

Note that the first two terms represent the cumulative emissions since the Industrial Revolution, approximated here as having occurred at  $t = -\infty$  and the additionally accumulated amount as of  $t = 0$ , when the in this thought experiment hypothetical switch to  $\text{CH}_4$  occurs. The third term represents the  $\text{CO}_2$ -equivalent of the accumulated fugitive  $\text{CH}_4$ . The fourth term accounts for the accumulated  $\text{CO}_2$  by oxidation of fugitive  $\text{CH}_4$ , oxidized at various times starting at  $t = 0$ .

In the case discussed in this paper, the function  $p$  is represented accurately by a simple exponential, as shown in the next Section 3, so that the integrals can be done exactly; in more complicated cases, numerical integration is straightforward. In practical applications of a dynamical scheme of this sort, it would suffice to use a finite-difference approximation based on yearly data and appropriately chosen initial conditions.

### 3 Results

Estimates of total carbon dioxide emissions from the beginning of the Industrial Revolution are available from ~~CDIAC (Carbon Dioxide Information Analysis Center (CDIAC), 2014)~~ the Carbon Dioxide Information Analysis Center (CDIAC) (2014). As shown in Fig. 1, the data can be represented surprisingly accurately by a simple exponential growth curve; the curve shown in Fig. 1 satisfies the equation

$$C_{\text{global}}(t) = 9.00 e^{0.025(\frac{t}{\text{year}} - 2010)} \text{ GtC/year}. \quad (11)$$

#### Global emissions in gigatons of carbon per year with exponential fit

This equation is used to define ~~“continuing business as usual.”~~ *business-as-usual*. The expression was obtained by a least squares fit, followed by a slight adjustment of the normalization constant so that the integral from  $-\infty$  to year 2011 reproduces

$$\int_{-\infty}^{2011 \text{ year}} C_{\text{global}}(t) dt = 365 \text{ GtC}, \quad (12)$$

the CDIAC estimate of 2011 cumulative emissions (~~Carbon Dioxide Information Analysis Center (CDIAC), 2014~~).

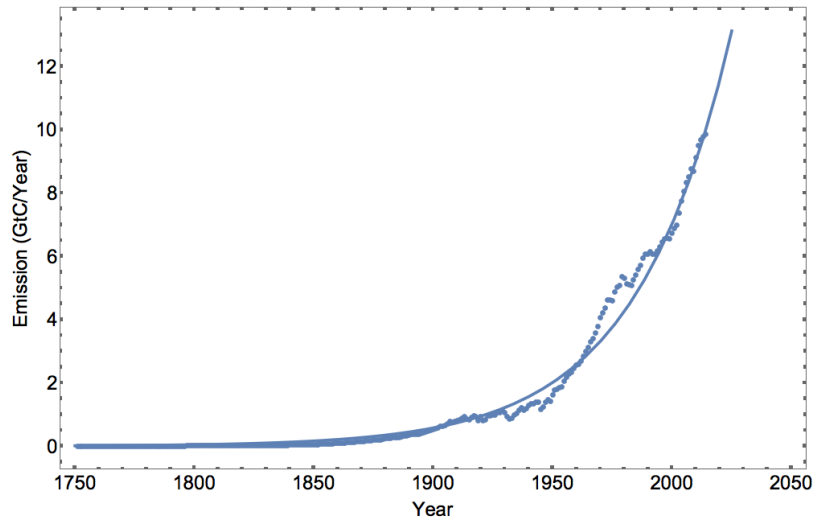

**Figure 1.** Global CO<sub>2</sub> emissions in gigatons of carbon per year with exponential fit, Eq. (11).

Given that CO<sub>2</sub> emissions are the predominant driver of global warming, it is not surprising that temperature anomaly  $T$ , shown in Fig. 2, is consistent with the climate forcing resulting from these emissions. The temperature anomaly data of

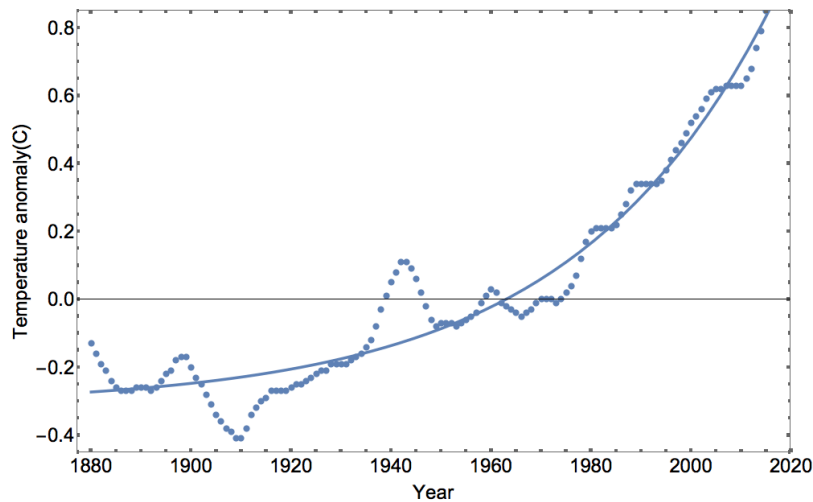

**Figure 2.** Temperature anomaly, the change in the global surface temperature relative to 1951–1980 average temperature (NASA, 2017). Dots represent five-year moving averages; the solid curve is given by Eq. (13).

NASA/GISS (NASA, 2017) can be used for a linear regression, two-parameter least-squares fit using the same exponential function used featured in Eq. (11). This yields the following expression

$$5 \quad T(t) = -0.3^{\circ}\text{C} + 1.0^{\circ}\text{C} e^{0.025\left(\frac{t}{\text{year}} - 2010\right)}, \quad (13)$$



shown as the solid curve in Fig. 2. ~~Temperature anomaly, the change in the global surface temperature relative to 1951–1980 average temperature (NASA, 2017). Dots represent five-year moving averages; the solid curve is given by Eq. (13).~~

Here are the results of one thought experiment: assume, first of all, that business-as-usual continues and that global energy consumption keeps growing exponentially, and, secondly, that power is generated by combustion of coal or oil before 2018 and of CH<sub>4</sub> after that, corresponding to time  $t = 0$  in Section 2 and the vanishing upper limit in the first integral and lower limits of the integrals in Eq. (10).

This produces Fig. 3 in which the solid black curve on the left represents the actual, historical development, a trajectory

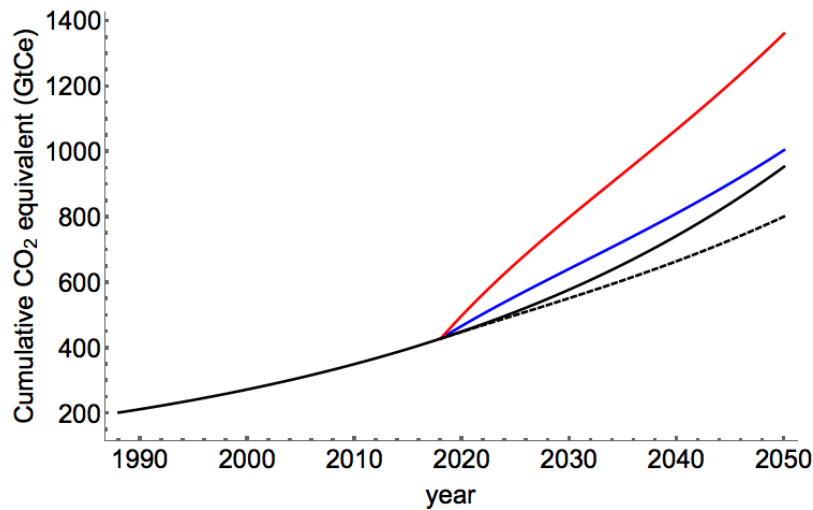

**Figure 3.** Four emission scenarios: (1) Business-as-usual using coal (black curve); after 2018: (2) CH<sub>4</sub> with 6% fugitive (blue); (3) CH<sub>4</sub> with 12% fugitive (red curve); (4) CH<sub>4</sub> with critical fugitive fraction, (dashed) 2.2%, as shown in Tab. 1.

continued on the right. The blue curve starting in 2018 corresponds to a hypothetical, complete switch to CH<sub>4</sub> in that year with 6% of the CH<sub>4</sub> escaping unburned, *i.e.*, half of ~~Howarth's estimate (Howarth, 2015) the estimate in Howarth (2015).~~

The red curve corresponds to 12% fugitive CO<sub>2</sub>. Also included is a black-dashed curve for the critical fraction of fugitive methane as specified in Tab. 1. Fig. 4 is the same assuming that combustion of oil generates power before 2018. Because the efficiency increase is considerably less in this case, the deleterious effect of the fugitive CH<sub>4</sub> is more pronounced

~~in this case. Four emission scenarios: (1) Business-as-usual using coal (black curve); after 2018: (2) with 6% fugitive (blue); (3) with 12% fugitive (red curve); (4) with critical fugitive fraction, (dashed) 2.2%, as shown in Tab. 1.~~

~~Four emission scenarios: (1) Black: business as usual using oil (black curve); after 2018: (2) with 6% fugitive (blue); (3) with 12% fugitive (red); (4) with critical fugitive fraction, (dashed) 0.76%, as shown in Tab. 1.~~

~~Four emission scenarios: (1) Black: business as usual using oil (black curve); after 2018: (2) with 6% fugitive (blue); (3) with 12% fugitive (red); (4) with critical fugitive fraction, (dashed) 0.76%, as shown in Tab. 1.~~

Of course real life is not quite as simple as this thought experiment. However that may be, the results ~~clearly show strongly suggest~~ that, although the red and blue CH<sub>4</sub> curves will ultimately cross the black coal or oil curves, this does not happen sufficiently rapidly, *i.e.* within one or two decades, to justify the purported role of CH<sub>4</sub> ~~purported~~ as a bridge fuel.

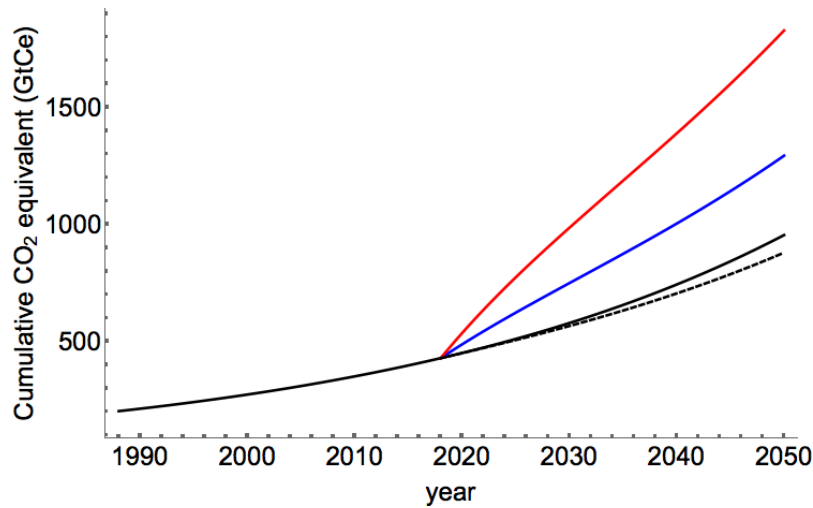

**Figure 4.** Four emission scenarios: (1) Black: business-as-usual using oil (black curve); after 2018: (2) CH<sub>4</sub> with 6% fugitive (blue); (3) CH<sub>4</sub> with 12% fugitive (red); (4) CH<sub>4</sub> with critical fugitive fraction, (dashed) 0.76%, as shown in Tab. 1.

Business-as-usual is one pathway, another one is to stay within ~~the carbon budget proposed by Hansen et al. (2013)~~. ~~The laws of nature allow humanity not to overspend this budget, but the required replacement of fossil fuels by renewables and energy conservation would require global collaboration and redistribution of wealth on unprecedented scale.~~ a finite carbon budget. Fig. 5 shows two pathways ~~that phase to phase out fossil fuels starting in 2018 and 2018~~. These pathways are consistent

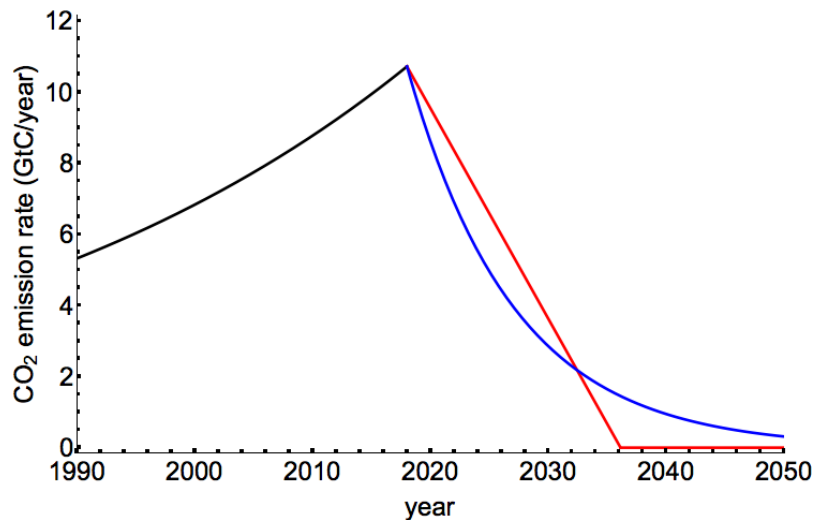

**Figure 5.** Global phase-out of fossil fuels: business-as-usual until 2018 followed by exponential (blue) and linear decay (red).

5 with the ~~proposed Hansen et al. budget~~ carbon budget proposed by Hansen et al. (2013). The area under both curves ~~, starting~~

at  $t = -\infty$ , that is the total CO<sub>2</sub> put into the atmosphere, is 525 GtC, a number chosen because it happens to reproduce the rates of emission reduction contained in the Hansen *et al.* 2013 Hansen et al. (2013) paper, *i.e.* 3.5% in 2003, 6% in 2013, and 15% in 2020. Global phase-out of fossil fuels: business as usual until 2018 followed by exponential (blue) and linear decay (red):

- 5 As an important aside, beyond the scope of the this paper, is that Hansen *et al.* have concluded, in view the industrialized world's lack of action, that the climate can only be stabilized by "negative emissions," *i.e.*, by extraction of from the air (Hansen et al., 2017). This approach will be very expensive; it is also fraught with danger because of the difficulty of accurately predicting the instabilities associated with our human time scale irreversible disintegration of ice sheets and ice shelves Hansen (2005).

In Fig. 6, the black curve shows cumulative emissions corresponding to a phase-out of fossil fuels following the exponentially

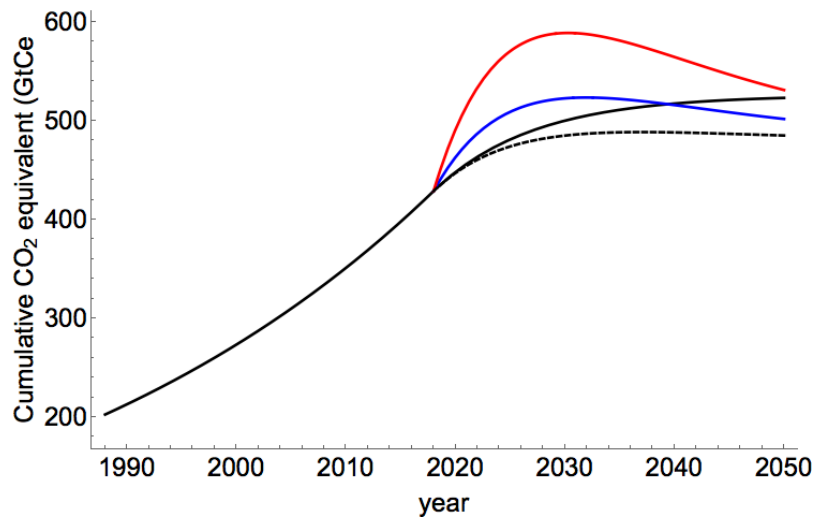

Figure 6. Four emission scenarios: exponential phase out of fossil fuel assuming (1) coal (black curve); (2) after 2018: CH<sub>4</sub> with 6% fugitive (blue); (3) CH<sub>4</sub> with 12% fugitive (red); (4) CH<sub>4</sub> with critical fugitive fraction, 2.2% (dashed), as shown in Tab. 1.

- 10 decaying pathway, the blue curve in in Fig. 5. The blue curve corresponds to a complete switch-over from coal to CH<sub>4</sub> in 2018 with 6% fugitive CH<sub>4</sub>; the red curve is the analog with 12% fugitive CH<sub>4</sub>. Fig. 7 differs only in that the switch-over is from oil to CH<sub>4</sub>. Once again, because the increase in efficiency (4/3) is less in this case, the relative importance of fugitive CH<sub>4</sub> is enhanced more pronounced. In both cases the dashed curves correspond to the respective fugitive fractions of coal and
- 15 oil. Four emission scenarios: exponential phase out of fossil fuel assuming (1) coal (black curve); (2) after 2018: with 6% fugitive (blue); (3) with 12% fugitive (red); (4) with critical fugitive fraction, 2.2% (dashed), as shown in Tab. 1. Four emission scenarios: Exponential phase out of fossil fuel assuming (1) oil (black curve); after 2018: (2) with 6% fugitive (blue); (3) with 12% fugitive (red); (4) with critical fugitive fraction, 0.76% (dashed), as shown in Tab. 1.

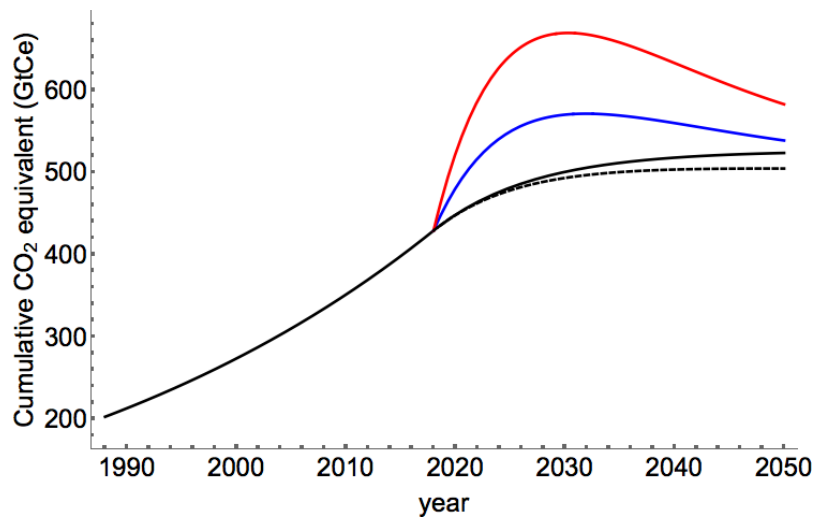

**Figure 7.** Four emission scenarios: Exponential phase out of fossil fuel assuming (1) oil (black curve); after 2018; (2) CH<sub>4</sub> with 6% fugitive (blue); (3) CH<sub>4</sub> with 12% fugitive (red); (4) CH<sub>4</sub> with critical fugitive fraction, 0.76% (dashed), as shown in Tab. 1.

#### 4 Conclusions

Overspending the carbon budget (mentioned in Section 2) while maintaining a for humans habitable climate is unlikely to be compatible with the time table imposed by the laws of nature. The required replacement of fossil fuels by renewables and energy conservation requires global collaboration and redistribution of wealth on an unprecedented scale. In this context it is worth noting that Hansen et al. (2017) have concluded, in view the industrialized world's lack of action since Hansen et al. (2013), that the climate can only be stabilized by “negative emissions.” *i.e.*, by extracting CO<sub>2</sub> from the atmosphere.

As illustrated in Figs. 3, 4, 6, and 7 clearly support, application of the policymaker-friendly tool proposed in this paper—a tool based on the instantaneous global warming potential—clearly supports what has been clear for some time, namely that “By The Time Natural Gas Has A Net Climate Benefit You’ll Likely Be Dead And The Climate Ruined,” as Joe Romm summarized it in the title of one of his posts post (Romm, 2014).

In other words, the order-of-magnitude time estimates implied by the graphs presented in Section 3 underscore that there is no scientific justification for using the 100-year horizon in energy policy choices involving natural gas. Reporting as a bridge fuel. Indeed, reporting based on CO<sub>2</sub> equivalents using the 100-year horizon, which is standard practice (World Resources Institute & World Business Council For Sustainable Development, 2013), is misleading and irreconcilable with the observed time-scale obscures short-term effects and is irreconcilable with both the observed timescale of developments of the climate system (National Oceanic Atmospheric Administration, a, b; Hansen et al., 2017). As the and with that of policy making, a point made by Steffen et al. (2018); Rintoul et al. (2018).

Employing the proposed policy tool, the numerical thought experiments presented in this paper demonstrate, Section 3 demonstrate that using more a realistic, dynamical-continuous-time dynamic approximation—one that is consistent with the

~~climate time scale—is technically trivial and vital for responsible public policy—~~timescale of climate change—is technically straightforward. At the same time, such a tool that respects the relevant timescales may be pivotal in public policy making that stands a chance of preserving a habitable climate for present and future generations.

There is general agreement that humanity has a finite carbon budget overspending of which is likely to cause irreparable harm to life on Earth. The Intergovernmental Panel on Climate Change (IPCC) in its Fifth Assessment Report (AR5) quoted as its estimate for this budget 2900 GtCO<sub>2</sub> (Intergovernmental Panel on Climate Change, 2014). Accounting for the molar mass ratio ( $\frac{12}{44}$ ) of carbon to carbon-dioxide this corresponds to 800 GtC. This number rests on the ill-founded, by now mostly abandoned, assumption that a 2°C global mean temperature increase is a “guardrail” that protects life on Earth—the biosphere from the essentially irreversible harm of run-away climate change (Geden, 2015; Friedman, 2015; Knutti et al., 2016). Indeed, ~~over the last couple of years, it has become increasingly clear—the climate science research over last decades implies~~ that relying on this upper limit ~~violates-is irreconcilable with~~ the precautionary approach of Principle 15 of the 1992 Rio Declaration, a treaty signed and ratified by many countries, including the United States (National Oceanic and Atmospheric Administration—Office of General Counsel).

Fig. 5 is consistent with 1°C as the “guardrail,” a choice based on paleoclimate and other arguments presented in detail by Hansen *et al.* in (Hansen et al., 2008, 2013; Hansen and Kharecha, 2013; Hansen et al., 2017). This ~~paper presented a simple model to simple policy tool presented here can~~ keep track of how much of the global greenhouse gas budget is spent in carbon-equivalent units, ~~a choice that defined in a way that that is consistent with the precautionary principle~~consistent with the Precautionary Principle.

As Figs. 6 and 7 make clear, there ~~is no rational argument—no scientific argument can be made~~ for phasing out fossil fuels while at the same time engaging in ~~a complete replacement of replacing~~ coal and oil power plants by natural ~~gas-fired-gas-fired~~ ones. The same, but to an even higher ~~degree, degree—as is clear from the critical fugitive fractions in Tab. 1—~~ applies to the introduction of natural gas vehicles (~~See e.g. State of Rhode Island Office of Energy Resources, 2015~~). ~~Nonetheless, that exactly seems to have been the national energy policy of the Obama administration and still is policy of the seemingly more enlightened states in the United States—,~~ a conclusion supported by a “pump-to-wheels” study by Clark et al. (2017) that does not take into consideration the full life-cycle, “wells-to-wheels” emissions associated with propulsion.

*Acknowledgements.* The author is greatly indebted to Professor Randy Watts for his careful reading of an early draft of this paper and for his invaluable suggestions. This paper is dedicated to the memory of Robert Malin.

*Competing interests.* No competing interests are present.

## References

- Brown, P. T. and Caldeira, K.: Greater future global warming inferred from Earth's recent energy budget, *Nature*, 552, 45–50, <https://doi.org/10.1038/nature24672>, 2017.
- Brysse, K., Oreskes, N., O'Reilly, J., and Oppenheimer, M.: Climate change prediction: Erring on the side of least drama?, *Global Environmental Change*, 23, 327–337, <https://doi.org/10.1016/j.gloenvcha.2012.10.008>, 2013.
- Carbon Dioxide Information Analysis Center (CDIAC): Fossil-fuel and other CO<sub>2</sub> Emissions, [http://cdiac.ess-dive.lbl.gov/ftp/ndp030/CSV-FILES/global.1751\\_2014.csv](http://cdiac.ess-dive.lbl.gov/ftp/ndp030/CSV-FILES/global.1751_2014.csv), 2014.
- Clark, N. N., Johnson, D. R., McKain, D. L., Wayne, W. S., Li, H., Rudek, J., Mongold, R. A., Sandoval, C., Covington, A. N., and Hailer, J. T.: Future methane emissions from the heavy-duty natural gas transportation sector for stasis, high, medium, and low scenarios in 2035, *Journal of the Air & Waste Management Association*, 67, 1328–1341, <https://doi.org/10.1080/10962247.2017.1368737>, <https://doi.org/10.1080/10962247.2017.1368737>, 2017.
- Drijfhout, S., Bathiany, S., Beaulieu, C., Brovkin, V., Claussen, M., Huntingford, C., Scheffer, M., Sgubin, G., and Swingedouw, D.: Catalogue of abrupt shifts in Intergovernmental Panel on Climate Change climate models, *Proceedings of the National Academy of Sciences*, pp. E5777–E5786, <https://doi.org/10.1073/pnas.1511451112>, 2015.
- Edwards, M. R. and Trancik, J. E.: Climate impacts of energy technologies depend on emissions timing, *Nature Climate Change*, 4, 347–352, <https://doi.org/10.1038/NCLIMATE2204>, 2014.
- Friedman, L.: Little Chance to Restrain Global Warming to 2 Degrees, *Critic Argues*, <https://www.scientificamerican.com/article/little-chance-to-restrain-global-warming-to-2-degrees-critic-argues/>, 2015.
- Geden, O.: Climate advisers must maintain integrity, *Nature*, 521, [https://www.nature.com/polopoly\\_fs/1.17468!/menu/main/topColumns/topLeftColumn/pdf/521027a.pdf](https://www.nature.com/polopoly_fs/1.17468!/menu/main/topColumns/topLeftColumn/pdf/521027a.pdf), 2015.
- Hansen, J.: A slippery slope: how much global warming constitutes 'dangerous anthropogenic interference'?, *Climatic Change*, 68, 269–279, [https://pubs.giss.nasa.gov/docs/2005/2005\\_Hansen\\_ha08010f.pdf](https://pubs.giss.nasa.gov/docs/2005/2005_Hansen_ha08010f.pdf), 2005.
- Hansen, J., Sato, M., Kharecha, P., von Schuckmann, K., Beerling, D. J., Cao, J., Marcott, S., Masson-Delmotte, V., Prather, M. J., Rohling, E. J., Shakun, J., Smith, P., Lakis, A., Russell, G., and Ruedy, R.: Young people's burden: requirement of negative CO<sub>2</sub> emissions, *Earth System Dynamics*, 8, 577–616, <https://www.earth-syst-dynam.net/8/577/2017/>, 2017.
- Hansen, J. E. and Kharecha, P.: Assessing 'dangerous climate change': required reduction of carbon emissions to protect young people, future generations and nature, [http://www.columbia.edu/~jeh1/mailings/2013/20131202\\_PopularSciencePlosOneE.pdf](http://www.columbia.edu/~jeh1/mailings/2013/20131202_PopularSciencePlosOneE.pdf), 2013.
- Hansen, J. E., Sato, M., Kareshaka, P., Beerling, D. J., Masson-Delmotte, V., Pagani, M., Raymo, M., Royer, D. L., and Zachos, J. C.: Target Atmospheric CO<sub>2</sub>: Where Should Humanity Aim?, *The Open Atmospheric Science Journal*, 2, 217–231, <https://benthamopen.com/contents/pdf/TOASCJ/TOASCJ-2-217.pdf>, 2008.
- Hansen, J. E., Kharecha, P., Sato, M., Masson-Delmotte, V., Ackerman, F., Beerling, D. J., Hearty, P. J., Hoegh-Guldberg, O., Hsu, S., Parmesan, C., Rockstrom, J., Rohling, E. J., Sachs, J., Smith, P., Steffen, K., Van Susteren, L., von Schuckmann, K., and Zachos, J. C.: Assessing 'dangerous climate change': required reduction of carbon emissions to protect young people, future generations and nature., *PLOS One*, <https://doi.org/10.1371/journal.pone.0081648>, <http://journals.plos.org/plosone/article?id=10.1371/journal.pone.0081648>, 2013.
- Houghton, J., Meira Filho, L.G. Callander, B., Harris, W., Kattenberg, A., and Maskell, K., eds.: Contribution of Working Group I to the Second Assessment Report of the Intergovernmental Panel on Climate Change, Cambridge University Press, [https://www.ipcc.ch/ipccreports/sar/wg\\_I/ipcc\\_sar\\_wg\\_I\\_full\\_report.pdf](https://www.ipcc.ch/ipccreports/sar/wg_I/ipcc_sar_wg_I_full_report.pdf), 1995.

- Howarth, R. W.: Methane emissions and climatic warming risk from hydraulic fracturing and shale gas development: implications for policy, *Energy and Emission Control Technologies*, pp. 45–54, <https://doi.org/10.2147/EECT.S61539>, 2015.
- Intergovernmental Panel on Climate Change: IPCC Fifth Assessment Report—Lima Climate Action High Level Session Lima, Perú, [https://www.ipcc.ch/news\\_and\\_events/docs/COP20/LCAHLD.pdf](https://www.ipcc.ch/news_and_events/docs/COP20/LCAHLD.pdf), 2014.
- 5 Knutti, R., Rogelj, J., Sedlacek, J., and Fischer, E. M.: A scientific critique of the two-degree climate change target, *Nature Geoscience*, 9, 13–18, <https://doi.org/10.1038/ngeo2595>, <http://dx.doi.org/10.1038/ngeo2595>, 2016.
- Matthews, H. D., Gillett, N. P., Stott, P. A., and Zickfeld, K.: The proportionality of global warming to cumulative carbon emissions, *Nature*, 459, 829–832, <https://doi.org/10.1038/nature08047>, 2009.
- Melillo, J. M., Richmond, T. C., and Yohe, G. W., eds.: *Climate Change Impacts in the United States: The Third National Climate Assessment*, U.S. Government Printing Office, <https://doi.org/10.7930/J0Z31WJ2>, <http://nca2014.globalchange.gov/downloads/>, 2014.
- 10 Myhre, G., Shindell, D., Bréon, F.-M., Collins, W., Fuglestedt, J., Huang, J., Koch, D., Lamarque, J.-F., Lee, D., Mendoza, B., Nakajima, T., Robock, A., Stephens, G., Takemura, T., and Zhang, H.: Anthropogenic and Natural Radiative Forcing, book section 8, pp. 659–740, Cambridge University Press, Cambridge, United Kingdom and New York, NY, USA, [https://www.ipcc.ch/pdf/assessment-report/ar5/wg1/WG1AR5\\_Chapter08\\_FINAL.pdf](https://www.ipcc.ch/pdf/assessment-report/ar5/wg1/WG1AR5_Chapter08_FINAL.pdf), 2013.
- 15 NASA: Global Climate Change: Vital Signs of Planet, <https://climate.nasa.gov/vital-signs/global-temperature/>, 2017.
- National Oceanic and Atmospheric Administration—Office of General Counsel: Precautionary Approach, [https://www.gc.noaa.gov/gcil\\_precautionary\\_approach.html](https://www.gc.noaa.gov/gcil_precautionary_approach.html), 2017.
- National Oceanic Atmospheric Administration: Unprecedented Arctic warmth in 2016 triggers massive decline in sea ice, snow, <http://www.noaa.gov/media-release/unprecedented-arctic-warmth-in-2016-triggers-massive-decline-in-sea-ice-snow>, complete report:
- 20 [ftp://ftp.oar.noaa.gov/arctic/documents/ArcticReportCard\\_full\\_report2016.pdf](ftp://ftp.oar.noaa.gov/arctic/documents/ArcticReportCard_full_report2016.pdf), a.
- National Oceanic Atmospheric Administration: Arctic shows no sign of returning to reliably frozen region of recent past decades, <http://arctic.noaa.gov/Report-Card/Report-Card-2017>, complete report:
- [ftp://ftp.oar.noaa.gov/arctic/documents/ArcticReportCard\\_full\\_report2017.pdf](ftp://ftp.oar.noaa.gov/arctic/documents/ArcticReportCard_full_report2017.pdf), b.
- Ocko, I. B., Hamburg, S. P., Jacob, D. J., Keith, D. W., Keohane, N. O., Oppenheimer, M., Roy-Mayhew, J. D., Schrag, D. P., and Pacala, S. W.: Unmask temporal trade-offs in climate policy debates, *Science*, 356, 492–493, <https://doi.org/10.1126/science.aaj2350>, 2017.
- 25 Oilchange International: Cashing in on all of the above: U.S. fossil fuel subsidies under Obama, [http://priceofoil.org/content/uploads/2014/07/OCI\\_US\\_FF\\_Subsidies\\_Final\\_Screen.pdf](http://priceofoil.org/content/uploads/2014/07/OCI_US_FF_Subsidies_Final_Screen.pdf), 2014.
- Pro Oxygen: CO<sub>2</sub>-earthDaily CO<sub>2</sub>, <https://www.co2.earth/daily-co2>, 2018.
- Rahmstorf, S., Cazenave, A., Church, J. A., Hansen, J. E., Keeling, R. F., Parker, D. E., and Somerville, R. C. J.: Recent Climate Observations Compared to Projections, *Science*, 316, 709, <http://science.sciencemag.org/content/sci/316/5825/709.full.pdf>, 2007.
- 30 Rintoul, S. R., Chown, S. L., DeConto, R. M., England, M. H., Fricker, H. A., Masson-Delmotte, V., Naish, T. R., Siebert, M. J., and Xavier, J. C.: Choosing the future of Antarctica, *Nature*, 558, 233–241, <https://doi.org/10.1038/s41586-018-0173-4>, 2018.
- Romm, J.: By The time natural gas has a net climate benefit you'll likely be dead and the climate ruined, *Think Progress*, <https://thinkprogress.org/by-the-time-natural-gas-has-a-net-climate-benefit-youll-likely-be-dead-and-the-climate-ruined-22fd00f89e73/>, 2014.
- 35 State of Rhode Island Office of Energy Resources: State of Rhode Island Zero Emission Vehicle Action Plan (DRAFT October 2015), <http://www.energy.ri.gov/documents/Transportation/Rhode%20Island%20ZEV%20Action%20Plan.pdf>, 2015.
- Steffen, W., Rockström, J., Richardson, K., Lenton, T. M., Folke, C., Liverman, D., Summerhayes, C. P., Barnosky, A. D., Cornell, S. E., Crucifix, M., Donges, J. F., Fetzer, I., Lade, S. J., Scheffer, M., Winkelmann, R., and Schellnhuber, H. J.: Trajectories of the Earth System

- in the Anthropocene, *Proceedings of the National Academy of Sciences*, <https://doi.org/10.1073/pnas.1810141115>, <http://www.pnas.org/content/early/2018/07/31/1810141115>, 2018.
- 5 Stocker, T. F., Qin, D., Plattner, G.-K., Tignor, M., Allen, S. K., Boschung, J., Nauels, A., Xia, Y., Bex, V., and Midgley, P. M., eds.: *Climate Change 2013: The Physical Science Basis. Contribution of Working Group I to the Fifth Assessment Report of the Intergovernmental Panel on Climate Change*. Cambridge University Press, Cambridge, United Kingdom and New York, NY, USA, 2013.
- Turner, A. J., Jacob, D. J., Benmergui, J., Wofsy, S. C., Maasackers, J. D., Butz, A., Hasekamp, O., and Biraud, S. C.: A large increase in U.S. methane emissions over the past decade inferred from satellite data and surface observations, *Geophysical Research Letters*, 43, 2218–2224, <https://doi.org/10.1002/2016GL067987>, 2016GL067987, 2016.
- United Nations Change Change: United Nations Framework Convention on Climate Change, [http://unfccc.int/essential\\_background/convention/status\\_of\\_ratification/items/2631.php](http://unfccc.int/essential_background/convention/status_of_ratification/items/2631.php), 1994.
- 10 United Nations Framework Convention on Climate Change (UNFCCC): *Kyoto Protocol Reference Manual*, [http://unfccc.int/resource/docs/publications/08\\_unfccc\\_kp\\_ref\\_manual.pdf](http://unfccc.int/resource/docs/publications/08_unfccc_kp_ref_manual.pdf), 2008.
- United Nations General Assembly: Report of the United Nations Conference on Environment and Development, <http://www.un.org/documents/ga/conf151/aconf15126-1annex1.htm>, 1992.
- 15 U.S. Energy Information Administration (EIA): How much carbon dioxide is produced when different fuels are burned?, <https://www.eia.gov/tools/faqs/faq.php?id=73&t=11>, 2018.
- Worden, J. R., Bloom, A. A., Pandey, S., Jiang, Z., Worden, H. M., Walker, T. W., Houweling, S., and Röckmann, T.: Reduced biomass burning emissions reconcile conflicting estimates of the post-2006 atmospheric methane budget, *Nature Communications*, 8, 1–11, <https://doi.org/10.1038/s41467-017-02246-0>, 2017.
- 20 World Resources Institute & World Business Council For Sustainable Development: *Accounting and Reporting Standard Amendment: Required Greenhouse Gases in Inventories*, [http://www.ghgprotocol.org/sites/default/files/ghgp/standards\\_supporting/Required%20gases%20and%20GWP%20values.pdf](http://www.ghgprotocol.org/sites/default/files/ghgp/standards_supporting/Required%20gases%20and%20GWP%20values.pdf), 2013.
